# Supplementary material
Source: PubMed Central journal article supplement (PMC4165613)

Type of file: figure

Label: Figure S1

Filename: Fig S1 copy.jpg

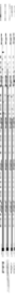

Type of file: figure

Label: Figure S10

Filename: Fig S10 copy.jpg

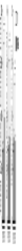

Type of file: figure

Label: Figure S11

Filename: Fig S11 copy.jpg

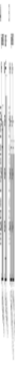

Type of file: figure

Label: Figure S2

Filename: Fig S2 copy.jpg

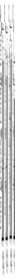



Type of file: figure

Label: Figure S3

Filename: Fig S3 copy.jpg

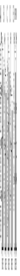

Type of file: figure

Label: Figure S4

Filename: Fig S4 copy.jpg

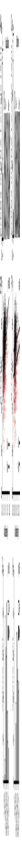

Type of file: figure

Label: Figure S5

Filename: Fig S5 copy.jpg

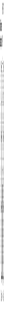

Type of file: figure

Label: Figure S6

Filename: Fig S6 copy.jpg

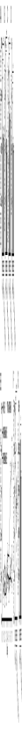



Type of file: figure

Label: Figure S7

Filename: Fig S7 copy.jpg

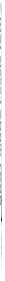

Type of file: figure

Label: Figure S8

Filename: Fig S8 copy.jpg

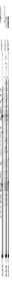

Type of file: figure

Label: Figure S9

Filename: Fig S9 copy.jpg

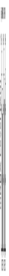

Supplement: NIHMS598855-supplement-01.pdf [file NIHMS598855-supplement-01.pdf]
